# Supplementary material for: Diagnosis and typing of influenza using fluorescent barcoded probes
Source: PubMed Central journal article supplement (PMC5741751; doi:10.1038/s41598-017-18333-7), 2017-12-22
Supplement: 41598_2017_18333_MOESM1_ESM.pdf [file 41598_2017_18333_MOESM1_ESM.pdf]

## Supplementary information

### Diagnosis and typing of influenza using fluorescent barcoded probes

Bixing Huang<sup>1</sup>, Nicholas P. West<sup>2</sup>, Jelena Vider<sup>2</sup>, Amanda J. Cox<sup>2</sup>, Tanya Constantino<sup>1</sup>, Bruce J. Harrower<sup>1</sup>, Alyssa T. Pyke<sup>1</sup>, Jamie McMahon<sup>1</sup>, Judith A. Northill<sup>1</sup>, Tim Riordan<sup>3</sup> and David Warrilow<sup>1\*</sup>

<sup>1</sup>Public Health Virology Laboratory, Queensland Health Forensic and Scientific Services, PO Box 594, Archerfield, Queensland 4108, Australia.

<sup>2</sup>Menzies Health Institute Queensland and School of Medical Science, Griffith University, Southport, Queensland 4222, Australia.

<sup>3</sup>NanoString Technologies, Suite 2000, 530 Fairview Avenue North, Seattle, WA 98109, USA.

\*Corresponding author

David Warrilow

Email: David\_Warrilow@health.qld.gov.au

Phone: 61-7-30962898

Fax: 61-7-30962878

Supplementary figure

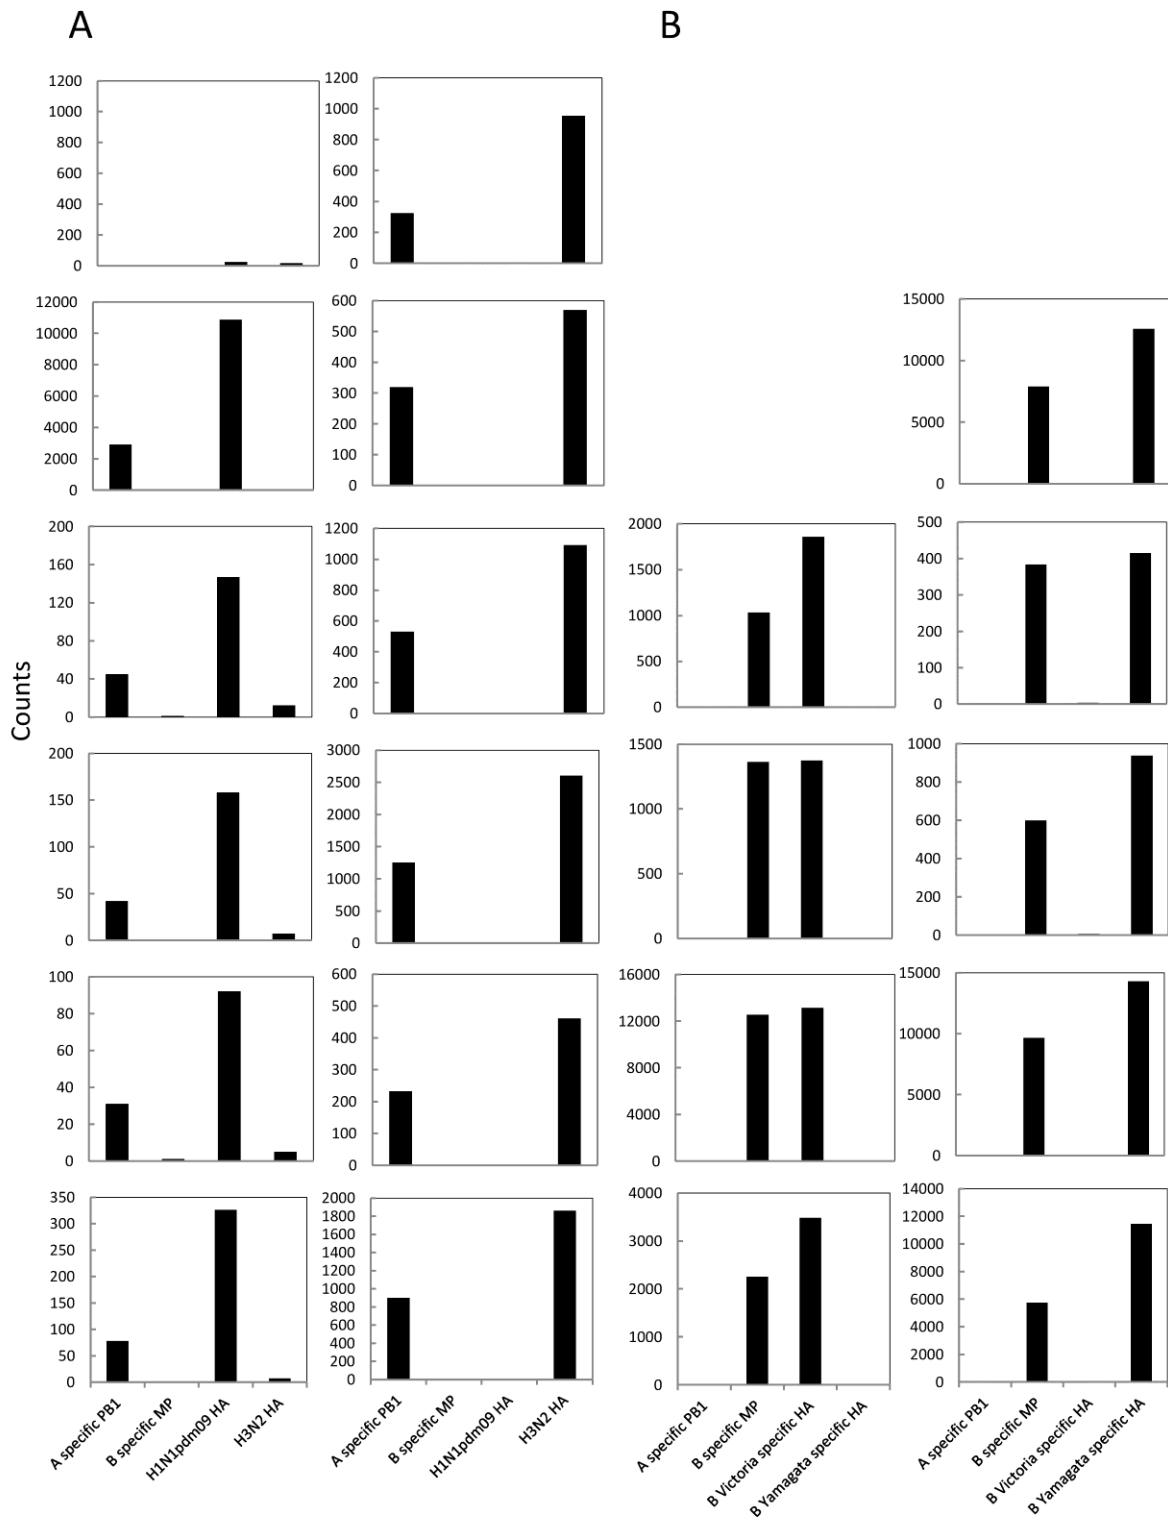

SUPPLEMENTARY FIG. 1. Typing and sub-typing of clinical respiratory samples. The FluST assay was performed on 21 respiratory samples (each graph represents a sample). The 4 columns show probe counts for (A) A-H1N1pdm09 and A-H3N2 and (B) B-Victoria and B-Yamagata, respectively.

## Supplementary method

### Influenza PCR-based typing and sub-typing

Briefly, 5µl of RNA extracted from patient samples using the BioRobot® Universal System and QIAamp One-For-All Nucleic Acid Kit, Qiagen, Australia) or EZ1 and Virus Mini Kit v2.0, Qiagen, Australia) were added to 15µl RT-PCR reactions (SSIII Platinum One-Step qRT-PCR System, Invitrogen, Australia; oligonucleotide sequences described in Table XX) and amplified using a RotorGene thermal cycler (Qiagen, Australia). Samples were reverse transcribed for 5 min at 50°C, incubated at 95°C for 2min then subjected to 40 cycles of 95°C for 3 sec and 60°C for 30 sec. Primer and probe oligonucleotides were synthesized by Sigma-Aldrich (Australia). Influenza B probes synthesized by Applied Biosystems (USA) Each amplification run included assay-specific primer control (5µl synthetic primer assay control RNA) and probe control (5µl synthetic probe assay control RNA) reactions constructed as outlined previously [1]. A positive result C<sub>T</sub> was determined for each sample; a C<sub>T</sub> value ≥40 cycles was selected to indicate no RNA was detected.

| Target virus | Hybridisation orientation | Primer     | Final concentration (nM) | Origin     | Sequence                          |
|--------------|---------------------------|------------|--------------------------|------------|-----------------------------------|
| A/H1N1       | Sense                     | SwFluH1fwd | 900                      | This study | CCCCATTGCATTTGGGTAAA              |
|              | Antisense                 | SwFluH1rev | 700                      | This study | TGGAGAGTGATTCACACTCTGGAT          |
|              | Probe                     | SwFluH1Prb | 150                      | This study | FAM-TAACATTGCTGGCTGGATCCTGGGA-BHQ |

|        |           |                      |     |            |                              |
|--------|-----------|----------------------|-----|------------|------------------------------|
| A/H3N2 | Sense     | H3hFor1              | 500 | This study | GGTACGGYTTTCAGGCAT           |
|        | Antisense | H3hRev1              | 500 | This study | TCAATCTGATGGAATTTCTCGTTG     |
|        | Probe     | H3h-1144dProbe       | 300 | [2]        | FAM-CTGCTGCTTGTCTCTTCCCT-BHQ |
| B/     | Sense     | HAB-444fw            | 300 | [2]        | ACCCTACARAMTTGGAACYTCAGG     |
|        | Antisense | <i>HAB-524Rv</i>     | 900 | [2]        | ACAGCCCAAGCCATTGTTG          |
|        | Probe     | <i>HAB-499Probe</i>  | 250 | [2]        | VIC-ATCCGTTTCCATTGGTAA-MGB   |
|        | Probe     | <i>HAB-501bProbe</i> | 250 | [2]        | FAM-AAATCCGMTTTTAYTGGTAG-MGB |

1. Hall-Mendelin S, Pyke AT, Moore PR, Mackay IM, McMahon JL, Ritchie SA, et al. Assessment of Local Mosquito Species Incriminates *Aedes aegypti* as the Potential Vector of Zika Virus in Australia. *PLoS Negl Trop Dis*. 2016;10(9):e0004959. doi: 10.1371/journal.pntd.0004959. PubMed PMID: 27643685; PubMed Central PMCID: PMC5028067.
2. Organization WH. WHO information for molecular diagnosis of influenza virus - update: World Health Organization; 2015 [cited 2017 10/10/2017]. Available from: [http://www.who.int/influenza/gisrs\\_laboratory/molecular\\_diagnosis/en/](http://www.who.int/influenza/gisrs_laboratory/molecular_diagnosis/en/).

## Supplementary table

Table S1. NanoString probes

| Name    | Target                 | Typing or sub-typing | Probe A* sequence                                                                     | Probe B* sequence                                                           | Comment                                                   |
|---------|------------------------|----------------------|---------------------------------------------------------------------------------------|-----------------------------------------------------------------------------|-----------------------------------------------------------|
| Probe 1 | A specific MP          | Typing (A or B)      | TTGTTTTACGCTCACCGTGCCAGTGAGCGGAGGACTGCCTCAAGACCTAAGCGACAGCGTGACCTGTGTTCA              | CGAAAGCCATGACCTCCGATCACTCGCTAAAGACAAGACCAATTCTGTACCTTTGACTAAAGGGATTTAGGGT   | Probe B is a mix of two oligonucleotides for this target. |
| "       | "                      | "                    | "                                                                                     | CGAAAGCCATGACCTCCGATCACTCGCTAAAGACAAGACCAATTCTGTACCTTTGACTAAAGGGAAATTTAGGAT | "                                                         |
| Probe 2 | B specific MP          | Typing (A or B)      | AAAAGTTACACTGTTGGTTTGGTGGGAAAGAATTTGACCTAGACTCTGCCATCCTCTTTCTTTGGTGTGAGAAGATGCTC      | CGAAAGCCATGACCTCCGATCACTCCTACTTGTCTTATTGACAGAAGATGGAGAAGGCAAAGCAGAAGTATGAG  |                                                           |
| Probe 3 | H1N1pdm09 HA           | A sub-typing         | CATTGCTGGCTGGATCCTGGGAAACCCAGAGTGTGAATCACTCTCCACAGCACAAATCTCGCGGTTAGCAGGAAGGTTAGGGAAC | CGAAAGCCATGACCTCCGATCACTCAAATATGCAAATAGAGGGGTAGCCCCATTGCATTTGGGTAATGTAA     |                                                           |
| Probe 4 | H5N2 HA                | A sub-typing         | TTCCAAAATGTAACAGGATCACATACGGGGCCTGTCCAGATATGTTAACTGTTGAGATTATTGAGCTTCATGACCAGAAG      | CGAAAGCCATGACCTCCGATCACTCGCAAGTCTGAATGCATCTCCAAATGGAAGCATTTCCAATGACAAACCA   |                                                           |
| Probe 5 | B Victoria specific HA | B sub-typing         | CCAACGGAGTGACCACACATTACGTTTCACAGATTGGTGGCTTCCGAAATCCAATTTGGTTTTACTCCCTCGATTATGCGGAGT  | CGAAAGCCATGACCTCCGATCACTCAATGGCAAAGCTCTATGGGGACTCAAAGCCCCAGAAGTTCACCTCATCTG |                                                           |
| Probe 6 | B Yamagata specific HA | B sub-typing         | TGGAGTGGCAGTGGCGGCAGACCTTAAGAGTACACAAGAAGCTATAAATACTTTTCGGTTATATCTATCATTACTTGACACCT   | CGAAAGCCATGACCTCCGATCACTCTGGGAAGGAATGATTGCAGGTTGGCACGGATACATCTCACGGAGCAC    |                                                           |
| Probe 7 | A specific PB1         | Typing (A or B)      | GAGGCCATGGTGTCTAGGGCCCGGATTGATGCCAGCAACAGCCACTTTTTTCCAAATTTGCAAGAGCC                  | CGAAAGCCATGACCTCCGATCACTTTTTCCCTAGTAGTTCATATAGGAGACCGATTGGAATTTCTAGCATGGTG  | Replacement for A specific MP probe.                      |

\*probe type (not influenza A or B)
